# Supplementary material for: Magnetic nanoparticles: a strategy to target the choroidal layer in the posterior segment of the eye
Source: PubMed Central journal article supplement (PMC5335660; doi:10.1038/srep43092), 2017-03-03
Supplement: srep43092-s1.pdf [file srep43092-s1.pdf]

## Magnetic nanoparticles: a strategy to target the choroidal layer in the posterior segment of the eye

Martina Giannaccini<sup>1\*</sup>, Lucia Pedicini<sup>1</sup>, Guglielma De Matienzo<sup>1</sup>, Federica Chiellini<sup>2</sup>, Luciana Dente<sup>1</sup>, Vittoria Raffa<sup>1,3</sup>

1. Department of Biology, Università di Pisa, 56127, Pisa, Italy

2. Department of Chemistry and Industrial Chemistry, Università di Pisa, 56124, Pisa, Italy

3. Institute of Life Science, Scuola Superiore Sant'Anna, 56127, Pisa, Italy

\*corresponding author: [martina.giannaccini@gmail.com](mailto:martina.giannaccini@gmail.com); phone +39 0502211537; fax +39 0502211495

### Supplementary materials

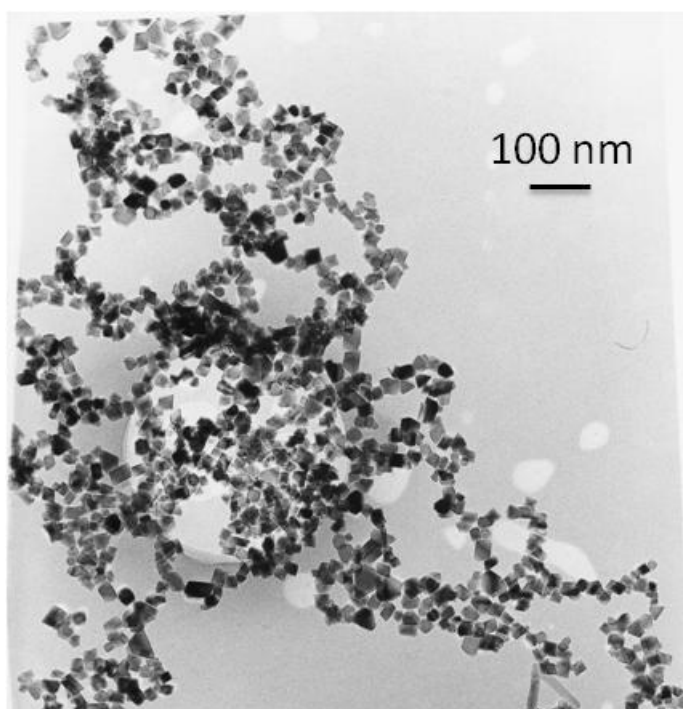

Figure S1: Commercial MNP produced by Micromod (79-02-501, nanomag<sup>®</sup> -D -spio)

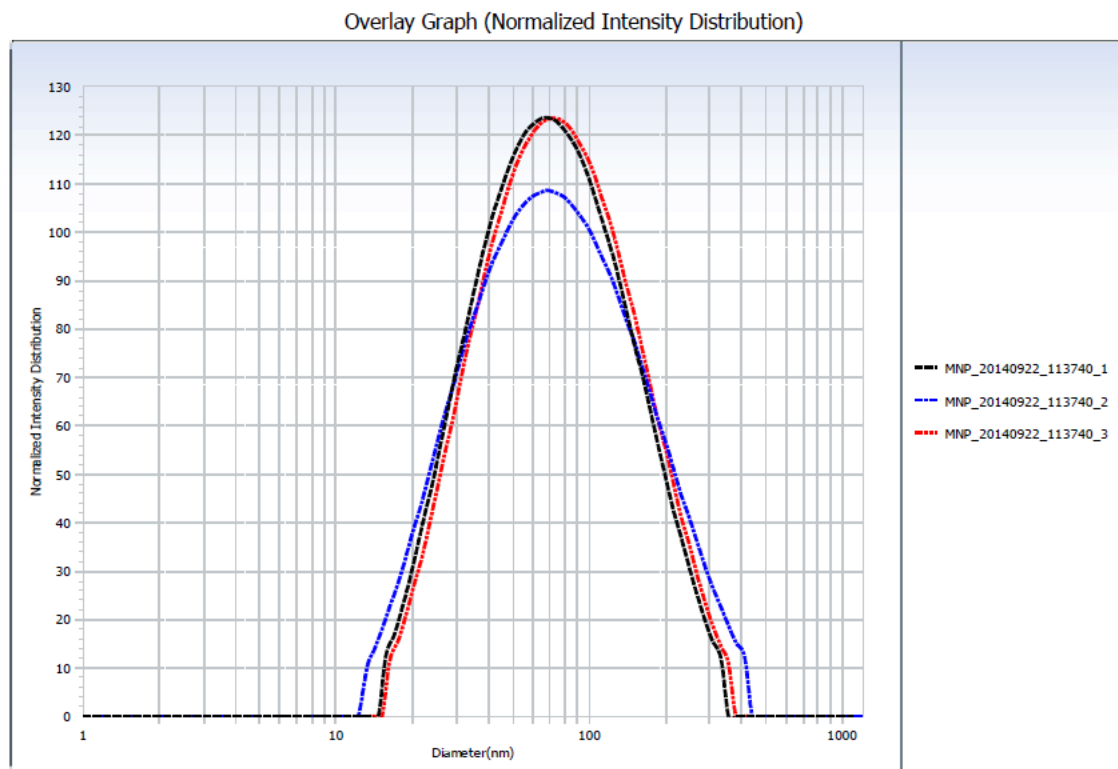

| No | Data                  | Repet. No | pH | Ave. Diameter(nm) | Polvdispersitv Index | D (10%) (nm) | D (50%) (nm) | D (9 |
|----|-----------------------|-----------|----|-------------------|----------------------|--------------|--------------|------|
| 1  | MNP_20140922_113740_1 | 1         | NA | 60.8              | 0.231                | 27.8         | 67.1         |      |
| 2  | MNP_20140922_113740_2 | 2         | NA | 59.4              | 0.309                | 25.3         | 68.8         |      |
| 3  | MNP_20140922_113740_3 | 3         | NA | 63.1              | 0.250                | 29.3         | 71.1         |      |

Figure S2: DLS analysis of MNP samples

Overlay Graph (Normalized Intensity Distribution)

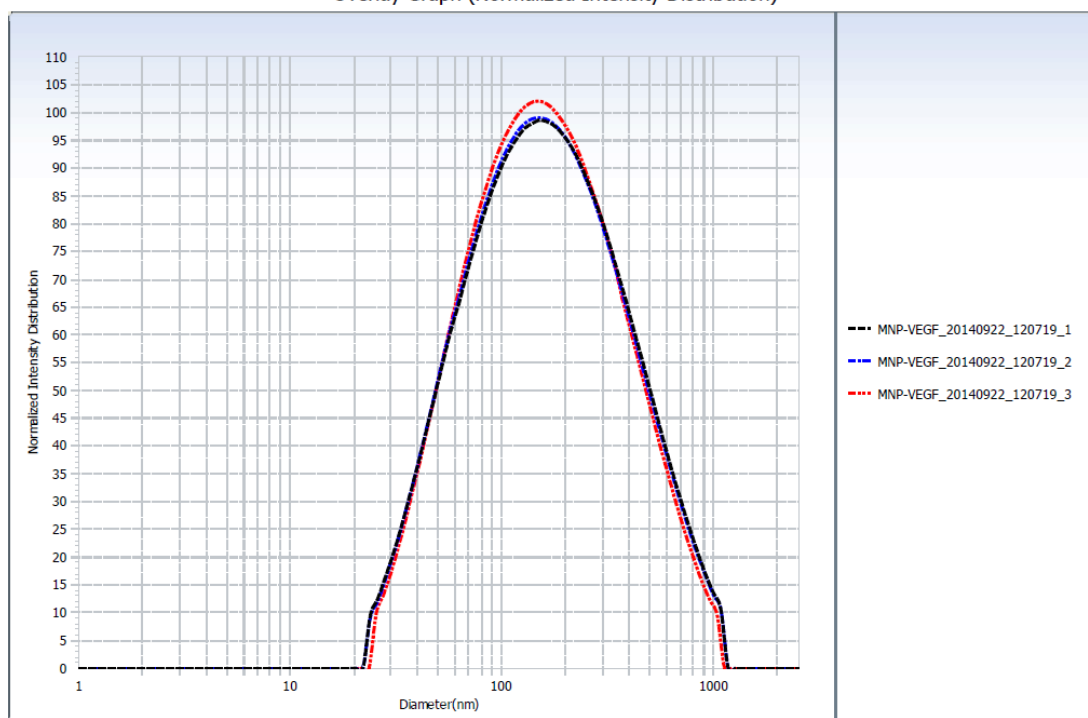

| No | Data                       | Repet. No | pH | Ave. Diameter(nm) | Polydispersity Index | D (10%) (nm) | D (50%) (nm) | D (90%) (nm) |
|----|----------------------------|-----------|----|-------------------|----------------------|--------------|--------------|--------------|
| 1  | MNP-VEGF_20140922_120719_1 | 1         | NA | 128.9             | 0.302                | 49.8         | 151.4        | 475.7        |
| 2  | MNP-VEGF_20140922_120719_2 | 2         | NA | 128.6             | 0.294                | 49.9         | 150.0        | 471.6        |
| 3  | MNP-VEGF_20140922_120719_3 | 3         | NA | 128.2             | 0.286                | 51.0         | 148.2        | 452.2        |

Figure S3: DLS analysis of MNP-rVEGF samples

Overlay Graph (Normalized Intensity Distribution)

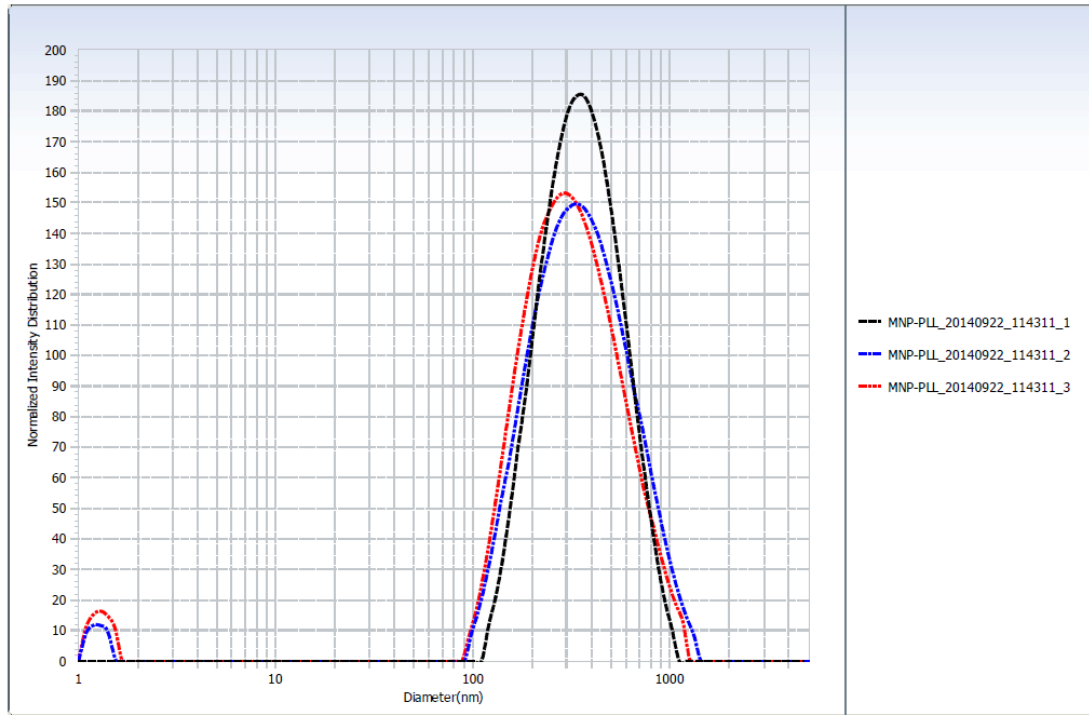

| No | Data                      | Repet. No | pH | Ave. Diameter(nm) | Polydispersity Index | D (10%) (nm) | D (50%) (nm) | D (90%) (nm) |
|----|---------------------------|-----------|----|-------------------|----------------------|--------------|--------------|--------------|
| 1  | MNP-PLL_20140922_114311_1 | 1         | NA | 318.0             | 0.171                | 183.9        | 334.8        | 611.7        |
| 2  | MNP-PLL_20140922_114311_2 | 2         | NA | 300.5             | 0.235                | 154.2        | 324.6        | 693.0        |
| 3  | MNP-PLL_20140922_114311_3 | 3         | NA | 279.0             | 0.247                | 141.8        | 291.6        | 625.2        |

Figure S4: DLS analysis of MNP-PLL samples

Overlay Graph

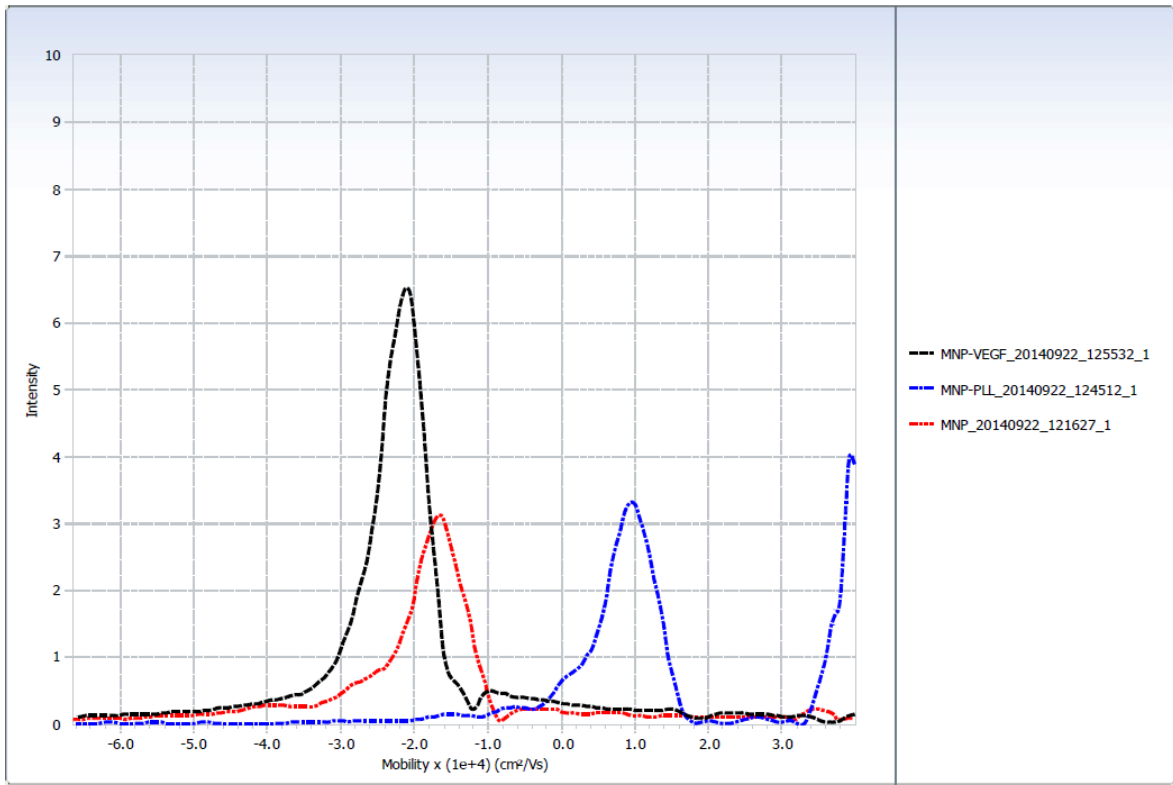

| No | File Name                | Repet. No | MeasTime | pH | Zeta Potential (mV) | Mobility (cm <sup>2</sup> /Vs) | E. Field (V/cm) |
|----|--------------------------|-----------|----------|----|---------------------|--------------------------------|-----------------|
| 1  | MNP-VEGF_20140922_125532 | 1         | 12:55:32 | NA | -32.49              | -2.164e-004                    | -77.80          |
| 2  | MNP-PLL_20140922_124512  | 1         | 12:45:12 | NA | 14.04               | 9.376e-005                     | -77.79          |
| 3  | MNP_20140922_121627      | 1         | 12:16:27 | NA | -25.59              | -1.695e-004                    | -77.76          |

Figure S5: Z potential analysis of MNP (red), MNP-rVEGF (black) and MNP-PLL (blue) samples.

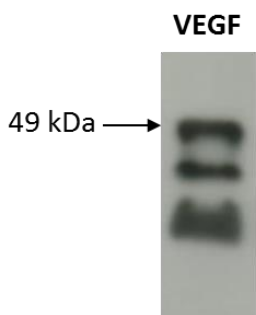

Figure S6: Western blot of purified rVEGF using an antibody against VEGF (sc-507 Santa Cruz, dilution 1:200). The rVEGF has a molecular weight of 49 kDa while the other bands are possibly generated by truncated forms of the fusion protein.

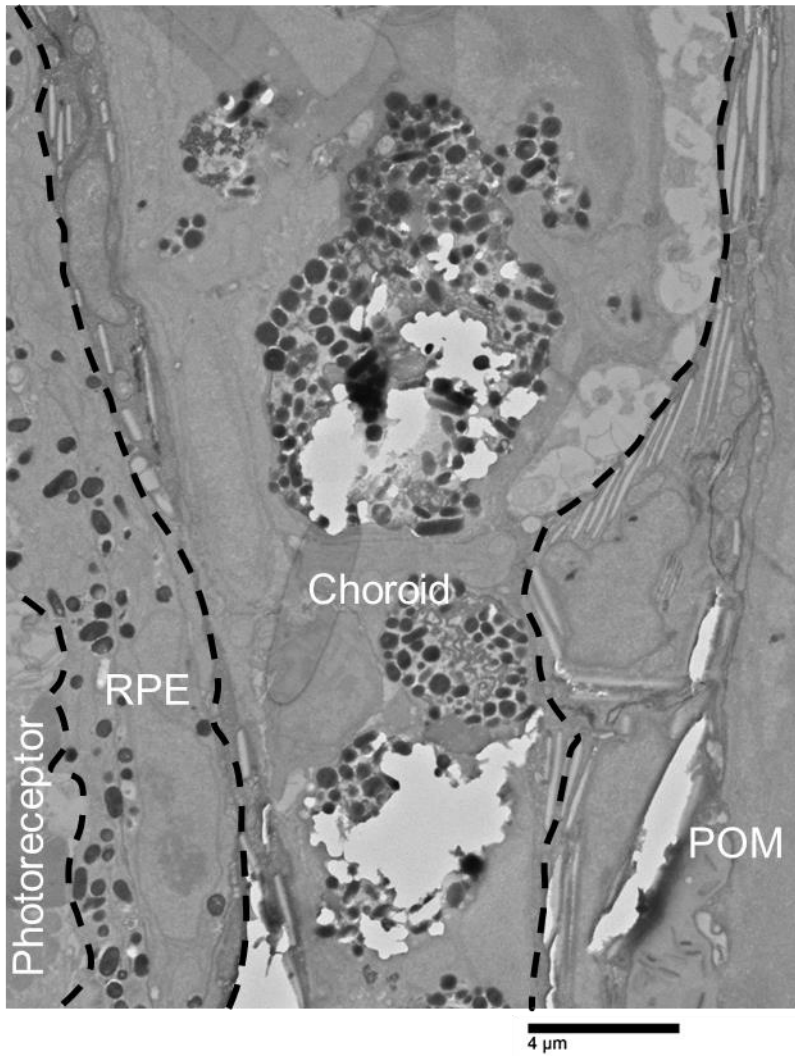

Figure S7: TEM image of an ultrathin section of zebrafish larva eye 72hpf. The photoreceptor, the RPE and the choroid layers are marked in the image. POM: perioocular mesenchyme.
